# Supplementary material for: Breast Cancer Screening Among Females With and Without Schizophrenia
Source: PubMed Central journal article supplement (PMC10687664; doi:10.1001/jamanetworkopen.2023.45530), 2023-11-29
Supplement: jamanetwopen-e2345530-s001.pdf [file jamanetwopen-e2345530-s001.pdf]

## Supplemental Online Content

O'Neill B, Yusuf A, Lofters A, et al. Breast cancer screening among females with and without schizophrenia. *JAMA Netw Open*. 2023;6(11):e2345530.  
doi:10.1001/jamanetworkopen.2023.45530

**eTable 1.** Databases Used in Study

**eTable 2.** Definitions of Primary Care Models

This supplemental material has been provided by the authors to give readers additional information about their work.

**eTable 1.** Databases Used in Study

| Database | Description                          | Time period searched       | Outcomes from this database | Covariates from this database                                                                                                                                                                                                                                                                                                                            |
|----------|--------------------------------------|----------------------------|-----------------------------|----------------------------------------------------------------------------------------------------------------------------------------------------------------------------------------------------------------------------------------------------------------------------------------------------------------------------------------------------------|
| OBSP     | Ontario Breast Screening Program     | January 2010-December 2019 | Mammography                 |                                                                                                                                                                                                                                                                                                                                                          |
| DAD      | Health Services Database             | January 2010-December 2019 |                             | Aggregated Diagnosis Groups (ADG) calculated using Johns Hopkins Adjusted Clinical Groups (ACG) system; number of emergency department visits for psychiatric conditions, number of emergency department visits for non-psychiatric conditions                                                                                                           |
| OHIP     | Ontario Health Insurance Plan claims | January 2010-December 2019 |                             | Aggregated Diagnosis Groups (ADG) calculated using Johns Hopkins Adjusted Clinical Groups (ACG) system; number of primary care visits; number of primary mental health care visits; number of primary non-mental health care visits; number of outpatient psychiatric visits; number of psychiatric hospitalizations; physician billing codes indicating |

|        |                                           |                            |  |                                                                                                                                        |
|--------|-------------------------------------------|----------------------------|--|----------------------------------------------------------------------------------------------------------------------------------------|
|        |                                           |                            |  | that radiologist read and reported a screening mammogram                                                                               |
| SDS    | Same Day Surgery Database                 | January 2010-December 2019 |  | Health Services                                                                                                                        |
| OMHRS  | Ontario Mental Health Reporting System    | January 2010-December 2019 |  | Number of psychiatric hospitalizations                                                                                                 |
| NACRS  | National Ambulatory Care Reporting System | January 2010-December 2019 |  | Number of emergency department visits for psychiatric conditions, number of emergency department visits for non-psychiatric conditions |
| CPDB   | Corporate Provider Database               | January 2010-December 2019 |  | Care Providers (Physician contract model)                                                                                              |
| CENSUS | Ontario Census Area Profiles              | January 2010-December 2019 |  | Income levels data                                                                                                                     |
| RPBD   | Registered Persons Database               | January 2010-December 2019 |  | Age and rurality data                                                                                                                  |
| LHIN   | Local Health Integration Network          | January 2010-December 2019 |  | Geography data                                                                                                                         |
| PCCF   | Postal Code Conversion File               | January 2010-December 2019 |  | Postal codes to organise income quintiles and ethnicity quintiles                                                                      |
| CAPE   | Client Agency Program Enrolment           | January 2010-December 2019 |  | Used to identify where cases and controls are rostered in team-based primary care models                                               |
| OCR    | Ontario Cancer Registry                   | January 2010-December 2019 |  | Used to exclude patients with breast cancer who would not have been eligible for screening mammogram                                   |

|       |                         |           |  |                                                                      |
|-------|-------------------------|-----------|--|----------------------------------------------------------------------|
| PCPOP | Primary Care Population | 2010-2016 |  | Physician roster sizes and identification of primary care physicians |
|-------|-------------------------|-----------|--|----------------------------------------------------------------------|

**eTable 2.** Definitions of Primary Care Models

| Primary care model                                              | Definition                                                                                                                                                                                       |
|-----------------------------------------------------------------|--------------------------------------------------------------------------------------------------------------------------------------------------------------------------------------------------|
| Family Health Team (FHT)                                        | FHTs are organizations that are comprised of family physicians, nurse practitioners, registered nurses, social workers, etc. who collaborate to meet primary health care for their community (1) |
| Non-FHT FHO (Family Health Organization)                        | FHO models have 3 or more physicians enrolled in an organization, and receive payment chiefly from capitation, and otherwise through FFS payments (2)                                            |
| FFS (Fee-for-Service)                                           | In FFS, physician payment is based on volume of individual services provided (2)                                                                                                                 |
| Enhanced FFS/FHG (Enhanced Fee-for-Service/Family Health Group) | Physicians compensated primarily through FFS, but also eligible for bonuses and/or premiums based on patient enrollment (2)                                                                      |

**Definition of primary exposure (diagnosis of schizophrenia)**

Diagnosis of schizophrenia either from hospitalization:

From CIHI-Discharge Abstract Database

Incidence of: ICD-9 codes: 295, 298

Or ICD-10 codes: F20, F25, F29

AND/OR

From Ontario Mental Health Recording System (OMHRS)

Incidence of ICD-9 codes: 295, 298

OR if 3 physician visits for schizophrenia within a 36-month period

Kurdyak et al.'s algorithm (3) was used to identify people with schizophrenia.

**Definition of Primary outcome**

Incident breast cancer screening as defined in OHIP database by:  
Physician billing code of X185, X172, X178 (denoting screening mammography completion) or a Q-code of Q131A ('family medicine' billing code denoting completion of screening mammography), or had been screened through the Ontario Breast Screening Program (OBSP)

## eReferences

1. Government of Ontario: Ministry of Health and Long-Term Care. Family Health Teams [Internet]. [cited 2023 May 8]. Available from: <https://www.health.gov.on.ca/en/pro/programs/fht/>
2. Government of Ontario, Ministry of Health and Long-Term Care. Primary Care Payment Models in Ontario. Government of Ontario, Ministry of Health and Long-Term Care; 2020.
3. Kurdyak P, Lin E, Green D, Vigod S. Validation of a Population-Based Algorithm to Detect Chronic Psychotic Illness. *Can J Psychiatry*. 2015 Aug;60(8):362–8.
