# Supplementary material for: Breast Cancer Screening Among Females With and Without Schizophrenia
Source: PubMed Central journal article supplement (PMC10687664; doi:10.1001/jamanetworkopen.2023.45530), 2023-11-29
Supplement: jamanetwopen-e2345530-s002.pdf [file jamanetwopen-e2345530-s002.pdf]

## Data Sharing Statement

O'Neill. Breast Cancer Screening Among Females With and Without Schizophrenia. *JAMA Netw Open*. Published November 29, 2023. doi:10.1001/jamanetworkopen.2023.45530

### Data

**Data available:** No

### Additional Information

**Explanation for why data not available:** Data used in this study are from ICES, which consist of record-level, coded and linkable health data sets from the population of Ontario. These data are held securely and are not publicly available.
